# Supplementary material
Source: PubMed Central journal article supplement (PMC1576262)
Supplement: 146-0706309x1.pdf [file 146-0706309x1.pdf]

# Immunofluorescence characterisation of mesothelial cells.

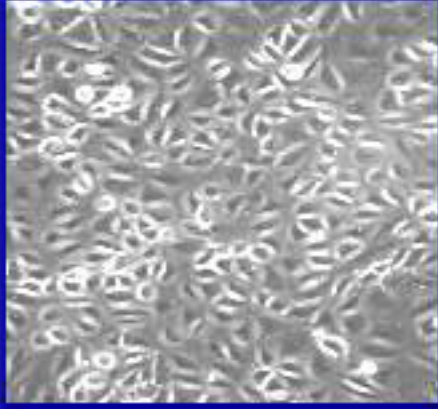

**CONFLUENT  
MESOTHELIAL CELLS**

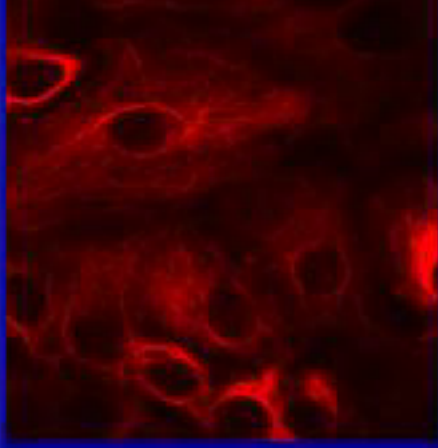

**CYTOKERATIN-18**

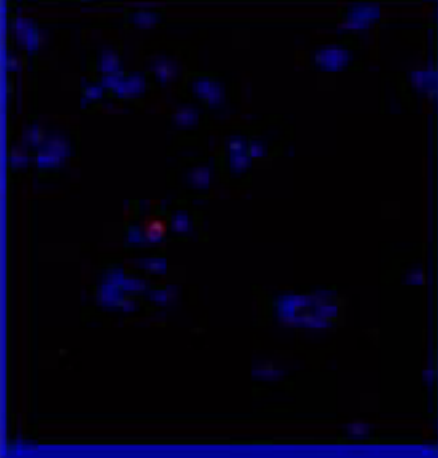

**PECAM-1 (CD31)**

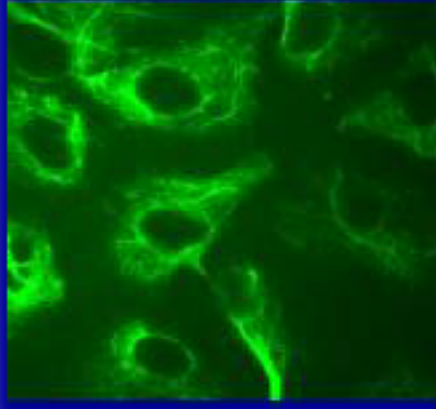

**VIMENTIN**

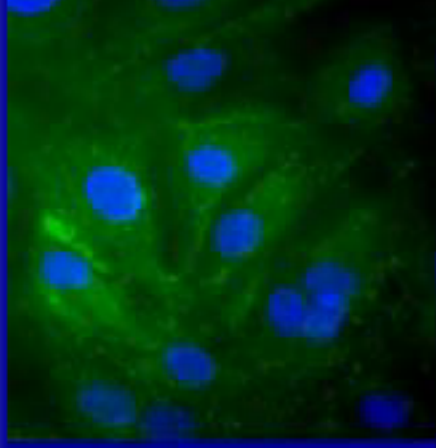

**E-CADHERIN**

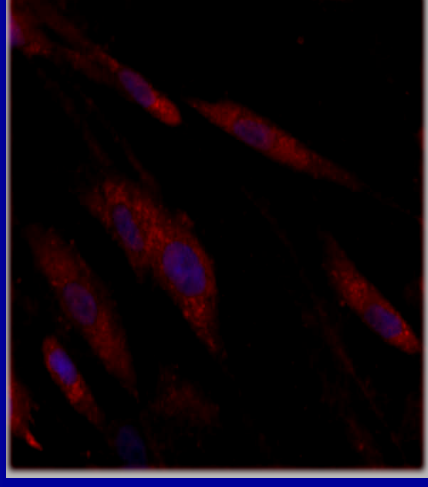

**Factor VIII**
