# Supplementary material
Source: PubMed Central journal article supplement (PMC1576262)
Supplement: 146-0706309x4.pdf [file 146-0706309x4.pdf]

# Effect of HHb on TNF- $\alpha$ and IL-1 $\beta$ mRNA expressions

**A.**

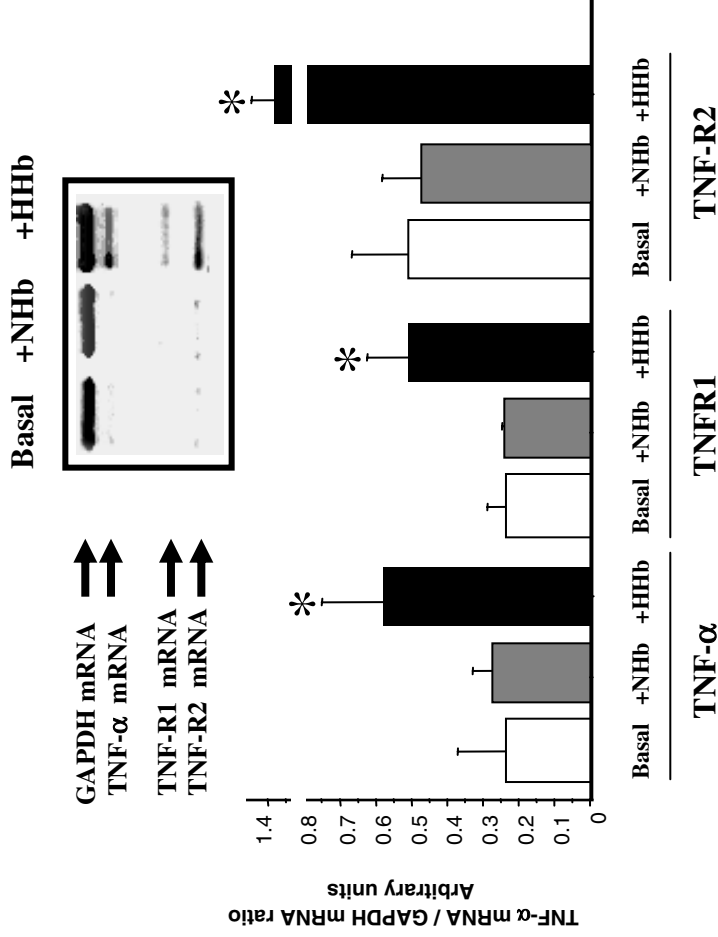

**B.**

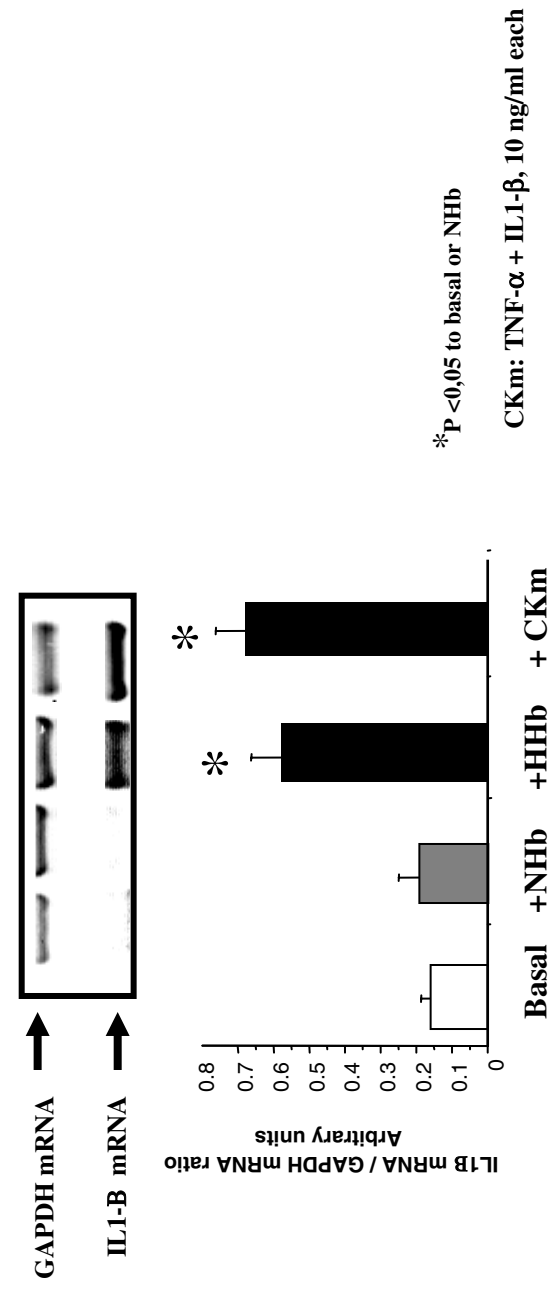

\*P < 0,05 to basal or NHb

CKm: TNF- $\alpha$  + IL1- $\beta$ , 10 ng/ml each
