# Supplementary material
Source: PubMed Central journal article supplement (PMC1576262)
Supplement: 146-0706309x6.pdf [file 146-0706309x6.pdf]

# NO production in HPMCs assessed by the cell permeable probe DAF-2DA

Basal

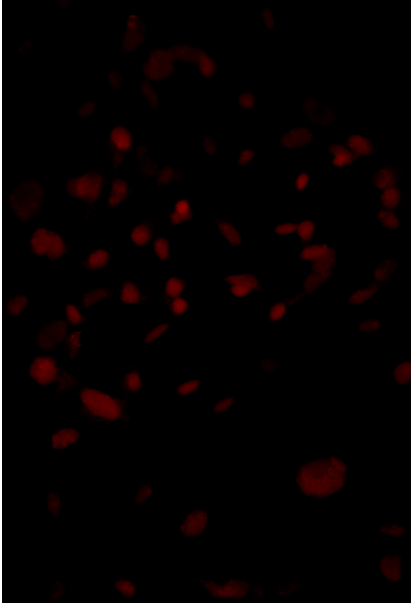

NHb

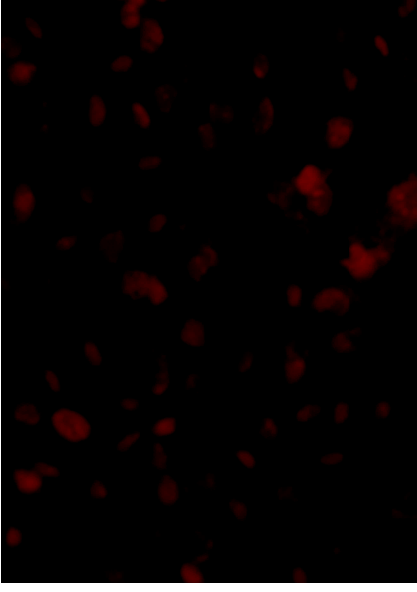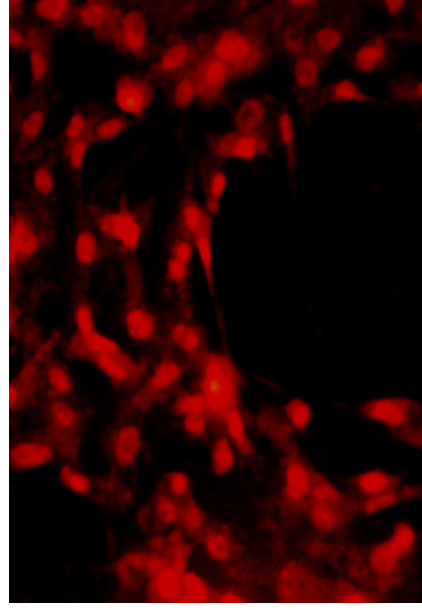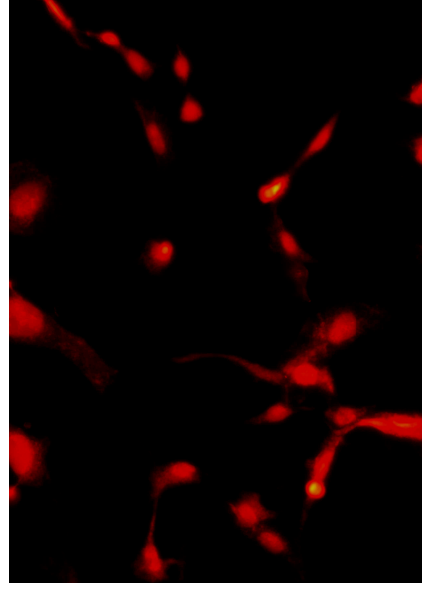

HHb

SNAP

*intracellular NO detection.* To determine the presence of intracellular NO, confluent HPMc are subjected to different treatments; NHb, HHb, SNAP or vehicle before NO probe (DAF-2DA; Alexis, Carlsbad, CA) is added. The product reacts rapidly with NO in presence of O<sub>2</sub> to form the highly fluorescent compound diazofluorescein (DAF-2T).
