# Supplementary material
Source: PubMed Central journal article supplement (PMC1576262)

## Time-dependent effect of HHb on NF- $\kappa$ B dependent transcriptional activity in HPMCs

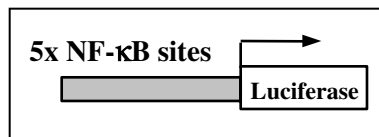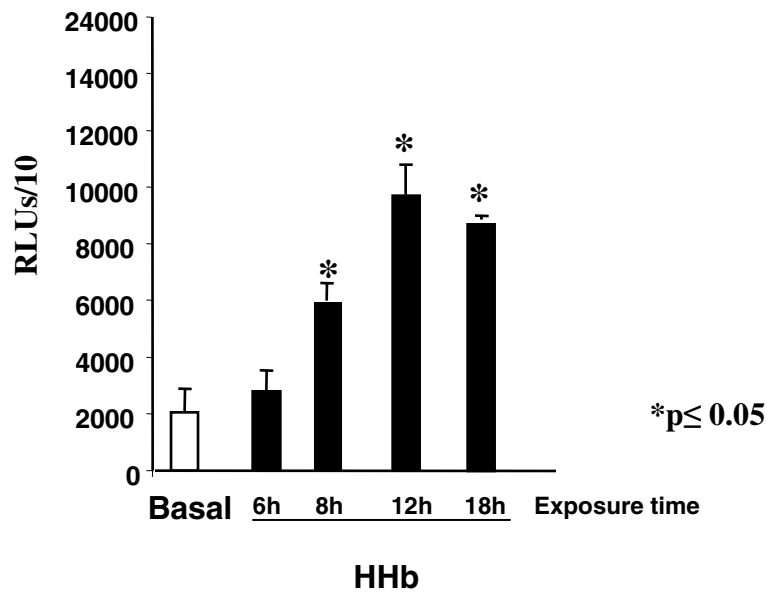

Supplement: 146-0706309x2.pdf [file 146-0706309x2.pdf]

## Effect of Amadori-adducts on eNOS and COX-1 promoter activities and gene expressions.

**a**

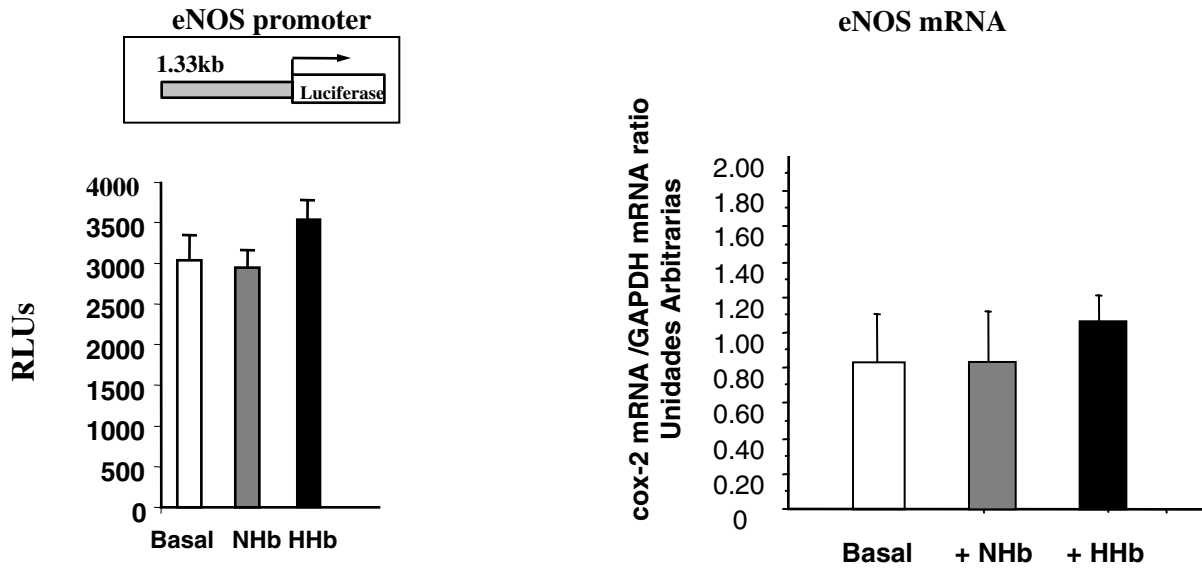

**b**

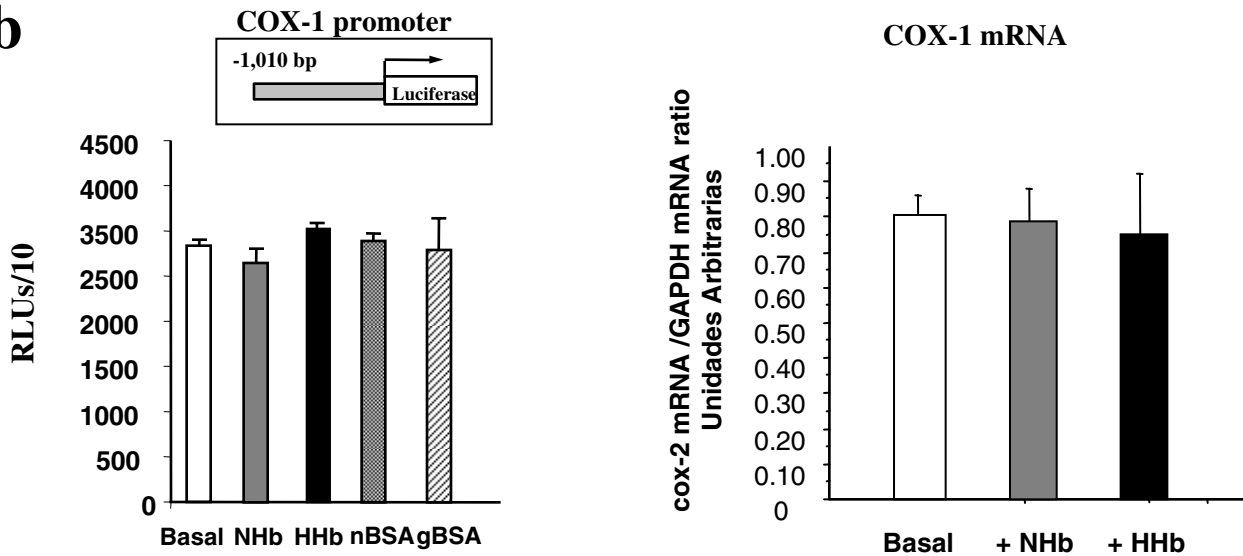

Supplement: 146-0706309x5.pdf [file 146-0706309x5.pdf]
